# Supplementary material
Source: PubMed Central journal article supplement (PMC2830289)
Supplement: NIHMS171540-supplement-01.pdf [file NIHMS171540-supplement-01.pdf]

**Table S1. Immunogen composition and immunization schedule.**

| Immunogen <sup>a</sup>                   | Description                          | Peptide                        | Dose used (μg) | Immunizations tested by ELISA <sup>b</sup>          |
|------------------------------------------|--------------------------------------|--------------------------------|----------------|-----------------------------------------------------|
| f8-5                                     | WT phage                             | -                              | 10             | 1 <sup>st</sup> , 3 <sup>rd</sup> , 5 <sup>th</sup> |
| Δ3                                       | Truncated pIII N-terminus            | -                              | 10             | 1 <sup>st</sup> , 3 <sup>rd</sup> , 5 <sup>th</sup> |
| Δ8                                       | Altered pVIII ID residues            | -                              | 10             | 1 <sup>st</sup> , 3 <sup>rd</sup> , 5 <sup>th</sup> |
| Δ8Δ3                                     | pIII truncation and pVIII alteration | -                              | 10             | 1 <sup>st</sup> , 3 <sup>rd</sup> , 5 <sup>th</sup> |
| f8-5/MD10rec                             | -                                    | MD10                           | 10             | 2 <sup>nd</sup> , 4 <sup>th</sup>                   |
| Δ3/MD10rec                               | -                                    | MD10                           | 10             | 2 <sup>nd</sup> , 4 <sup>th</sup>                   |
| f8-5/MD10conj                            | -                                    | MD10                           | 2              | 2 <sup>nd</sup> , 4 <sup>th</sup>                   |
| Δ3/MD10conj                              | -                                    | MD10                           | 2              | 2 <sup>nd</sup> , 4 <sup>th</sup>                   |
| f8-5/4E10 <sub>L</sub> <sup>A</sup> rec  | -                                    | 4E10 <sub>L</sub> <sup>A</sup> | 10             | 2 <sup>nd</sup> , 4 <sup>th</sup>                   |
| Δ3/4E10 <sub>L</sub> <sup>A</sup> rec    | -                                    | 4E10 <sub>L</sub> <sup>A</sup> | 10             | 2 <sup>nd</sup> , 4 <sup>th</sup>                   |
| f8-5/4E10 <sub>L</sub> <sup>B</sup> conj | -                                    | 4E10 <sub>L</sub> <sup>B</sup> | 2              | 2 <sup>nd</sup> , 4 <sup>th</sup>                   |
| Δ3/4E10 <sub>L</sub> <sup>B</sup> conj   | -                                    | 4E10 <sub>L</sub> <sup>B</sup> | 2              | 2 <sup>nd</sup> , 4 <sup>th</sup>                   |
| f8-5/SPDP                                | -                                    | -                              | 2              | 2 <sup>nd</sup> , 4 <sup>th</sup>                   |
| Δ3/SPDP                                  | -                                    | -                              | 2              | 2 <sup>nd</sup> , 4 <sup>th</sup>                   |

<sup>a</sup> All immunogens were administered in 100 μl PBS, *via* subcutaneous route, without adjuvant, every two weeks. Suffix “rec” indicates that the peptide was recombinantly fused to pVIII and “conj” indicates that a synthetic version of the peptide was chemically conjugated to the phage coat.

<sup>b</sup> Bleeds were taken two weeks after each immunization.

- **Supplemental Figure S1** Average half-maximal Ab titers against each phage variant (f8-5,  $\Delta 3$ ,  $\Delta 8$ , and  $\Delta 8\Delta 3$ ) produced by mice immunized five times with a single variant (f8-5,  $\Delta 3$ ,  $\Delta 8$ , or  $\Delta 8\Delta 3$ ). Error bars show standard error of the arithmetic mean. Note that the Y-axis is log scaled.
- **Supplemental Figure S2** Serum Ab reactivity with MD10 peptide and *S. flexneri* LPS after immunization with phage displaying recombinant MD10 peptide, phage treated with SPDP crosslinker alone, or unmodified phage. **(A)** Average anti-MD10 peptide and anti-*S. flexneri* LPS ELISA OD<sub>405-490</sub> signals at 1:50 serum dilutions after two and four immunizations with f8-5/MD10rec or  $\Delta 3$ /MD10rec recombinant phage. **(B)** Average anti-phage (f8-5 or  $\Delta 3$ ), anti-SPDP, and anti-*S. flexneri* LPS ELISA OD<sub>405-490</sub> signals at 1:50 serum dilutions after five immunizations with f8-5 phage,  $\Delta 3$  phage, f8-5/SPDP phage or  $\Delta 3$ /SPDP phage. Error bars show standard error of the arithmetic mean. All anti-phage signals, and possibly the highest anti-LPS signals, are at saturation.
- **Supplemental Figure S3** Titration ELISA of MAbs SYA/J6 or 4E10 on: **(A)** f8-5 and  $\Delta 3$  phage displaying recombinant MD10 peptide; **(B)** MD10 synthetic peptide conjugated to f8-5 and  $\Delta 3$  phage *via* the SPDP crosslinker; **(C)** f8-5 and  $\Delta 3$  phage displaying recombinant 4E10<sub>L<sup>A</sup></sub> peptide; **(D)** 4E10<sub>L<sup>B</sup></sub> synthetic peptide conjugated to f8-5 and  $\Delta 3$  phage *via* the SPDP crosslinker.
- **Supplemental Figure S4** SDS-PAGE analysis of **(A)** MD10 synthetic peptide conjugated to phage *via* the f8-5 and  $\Delta 3$  SPDP crosslinker or **(B)** 4E10<sub>L<sup>B</sup></sub> synthetic peptide conjugated to f8-5 and  $\Delta 3$  phage *via* the SPDP crosslinker. **(A)** Lane 1: f8-5, lane 2:  $\Delta 3$ , lane 3: f8-5/MD10conj, lane 4:  $\Delta 3$ /MD10conj, lane 5:  $\Delta 3$ /SPDP-Cys, lane 6: f8-5/MD10 no SPDP crosslinker control; **(B)** Lane 1: f8-5, lane 2:  $\Delta 3$ , lane 3: f8-5/4E10<sub>L<sup>B</sup></sub>conj, lane 4:  $\Delta 3$ /4E10<sub>L<sup>B</sup></sub>conj, lane 5: f8-5/4E10<sub>L<sup>B</sup></sub> no SPDP crosslinker control, lane 6:  $\Delta 3$ /SPDP-Cys.

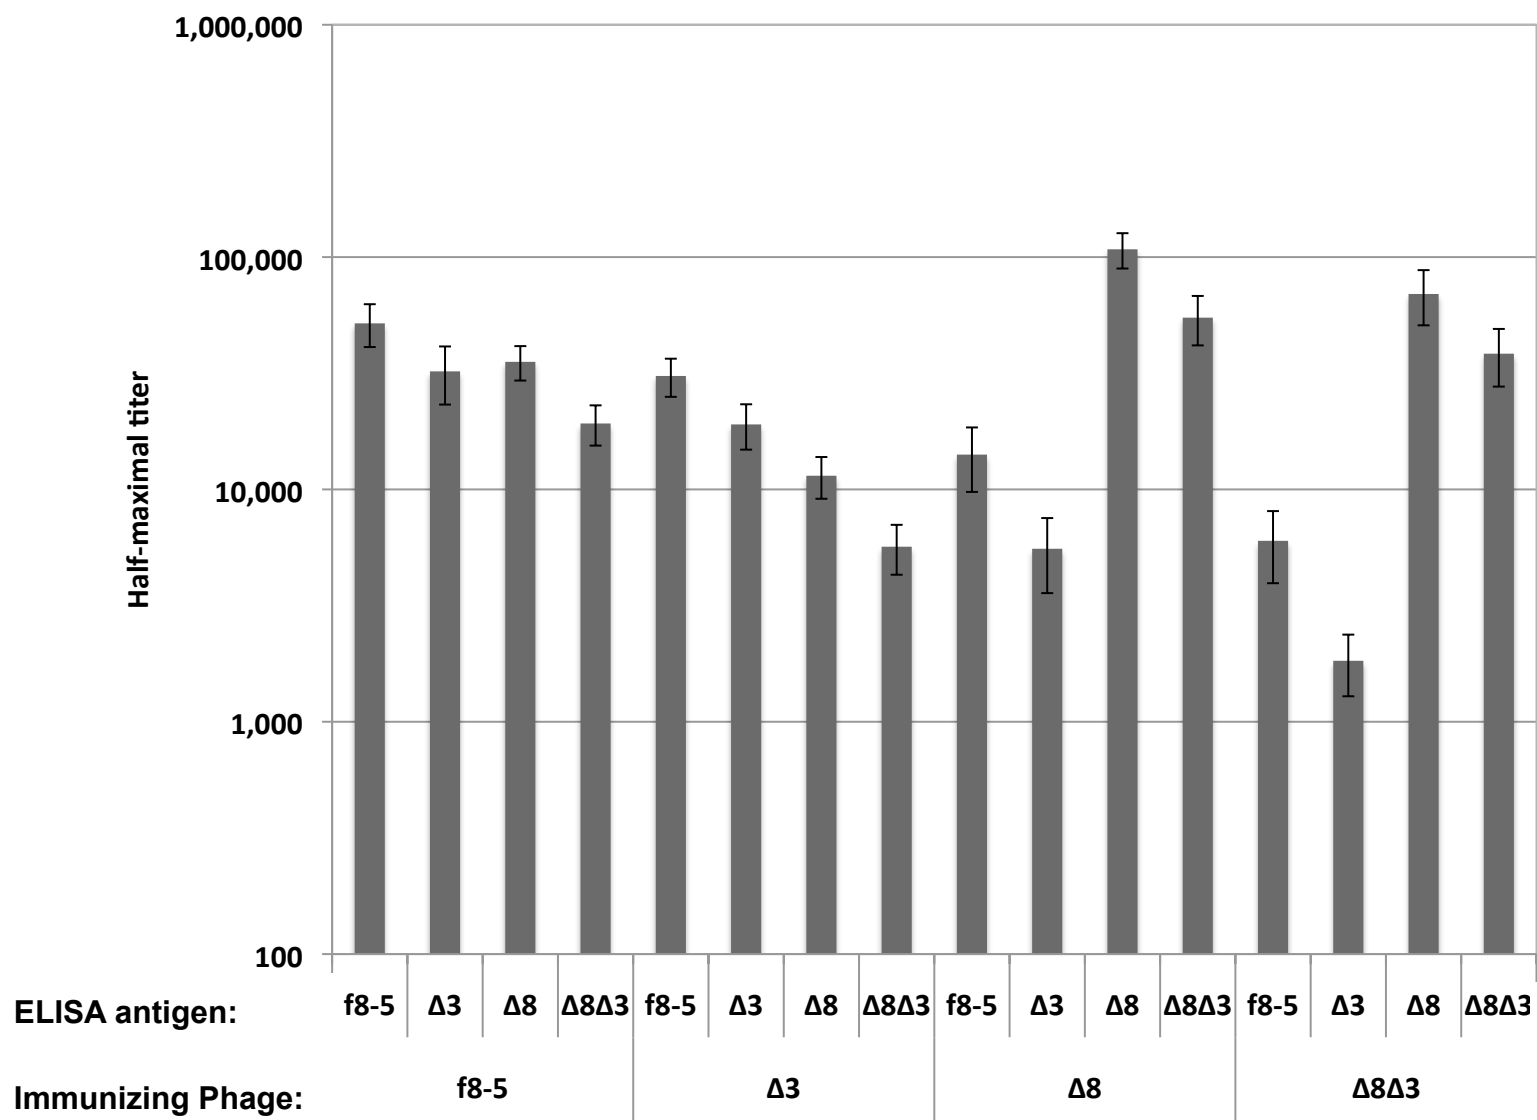

Supplemental Figure S1

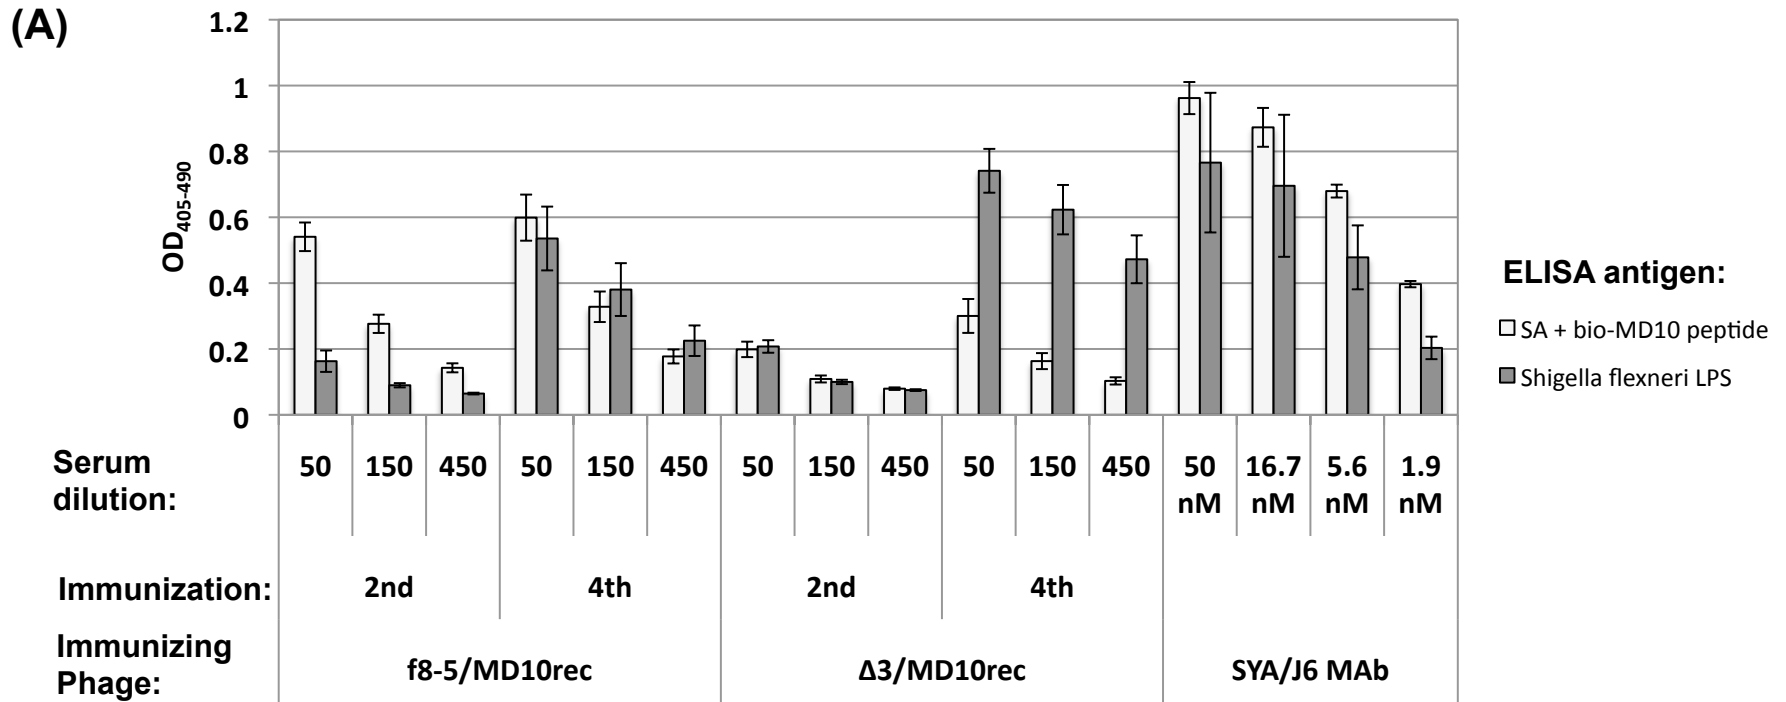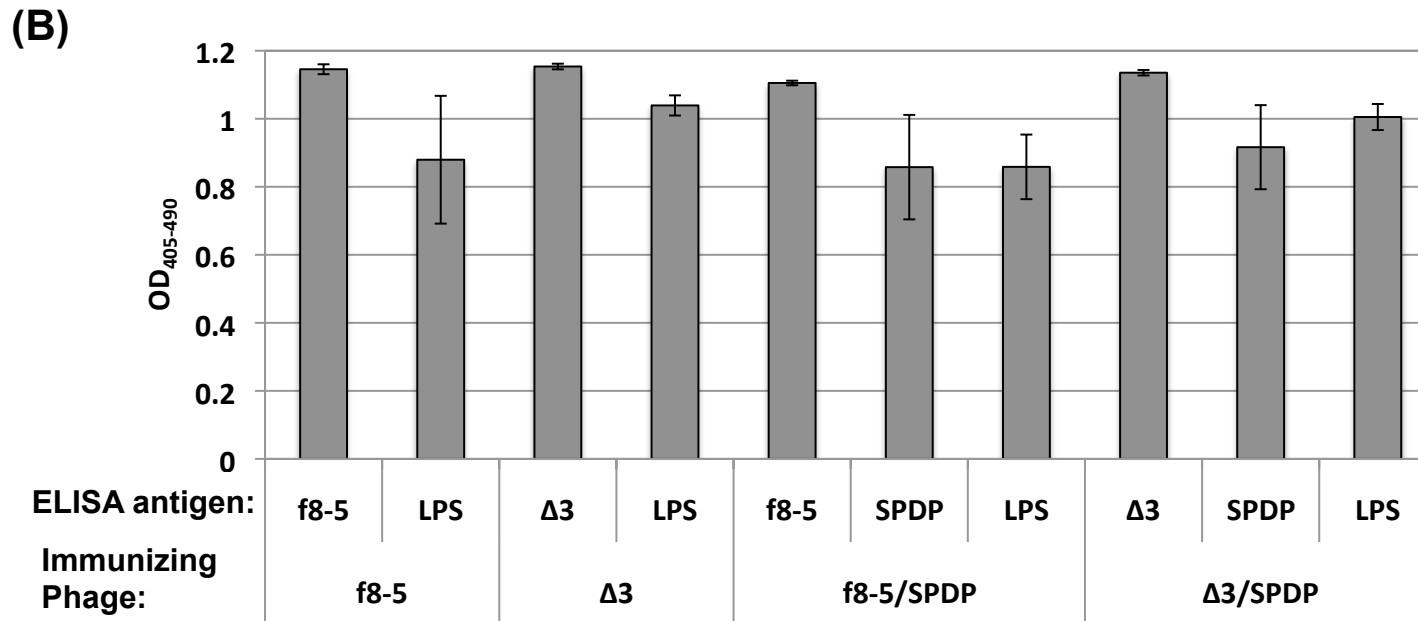

Supplemental Figure S2

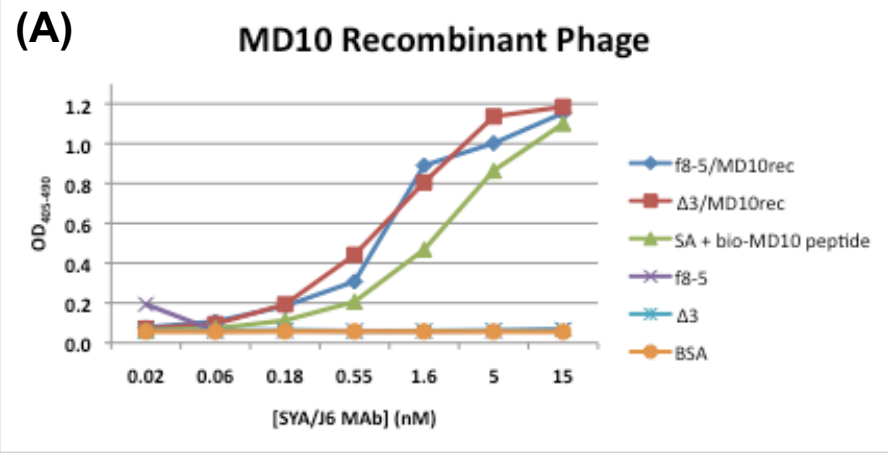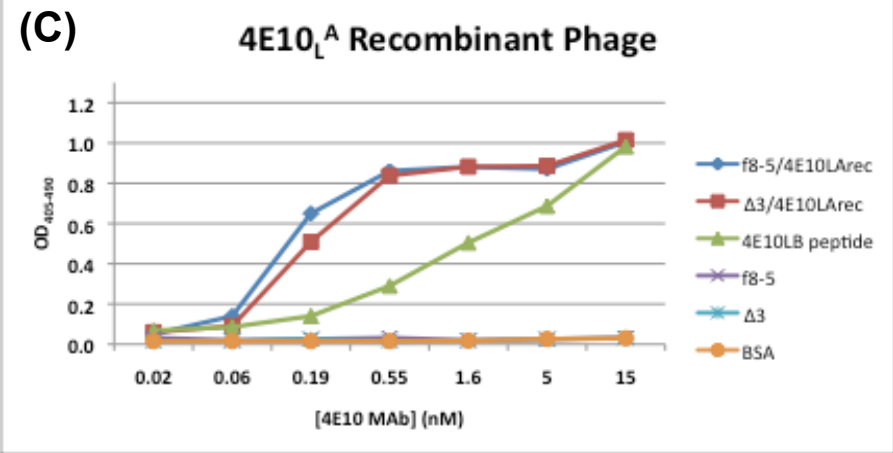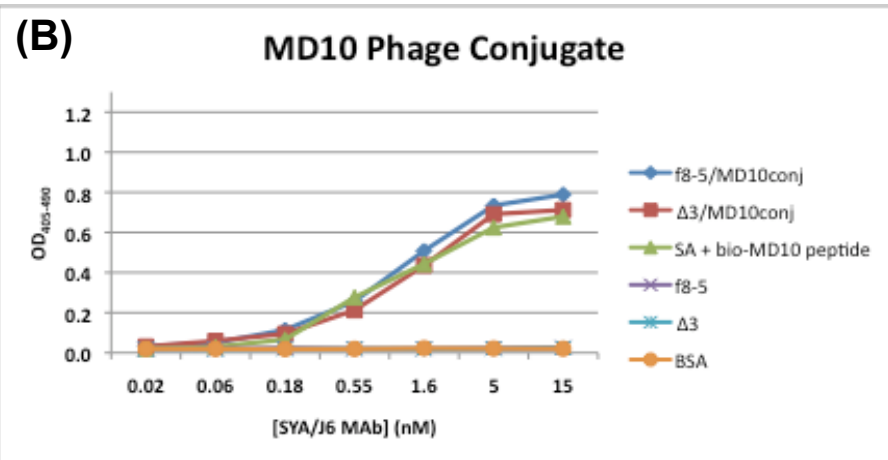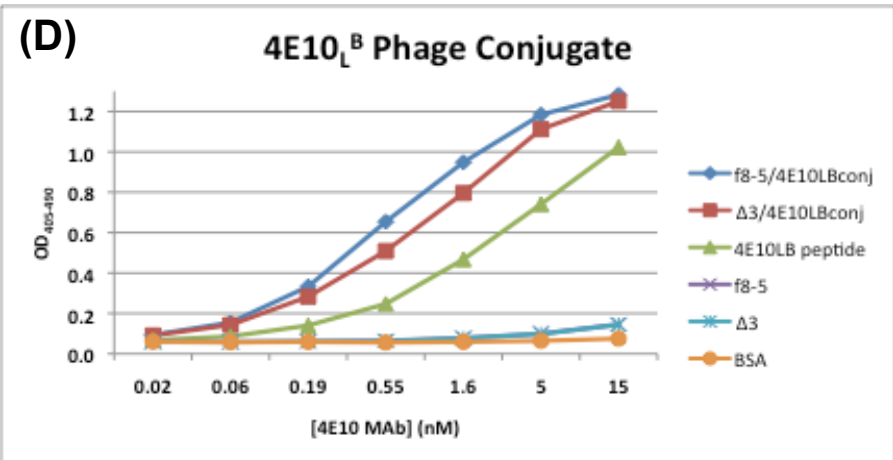

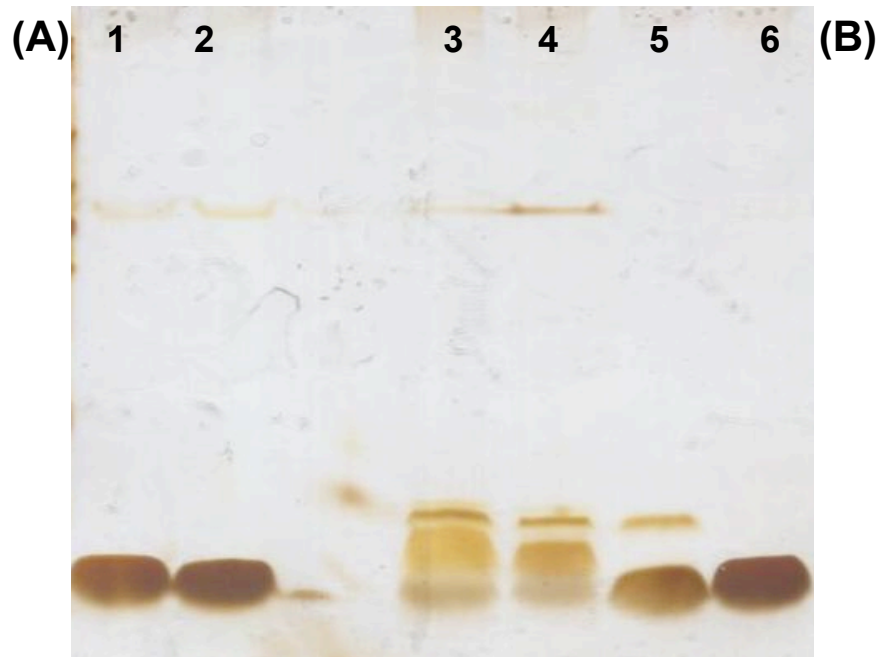

**MD10 Phage Conjugate**

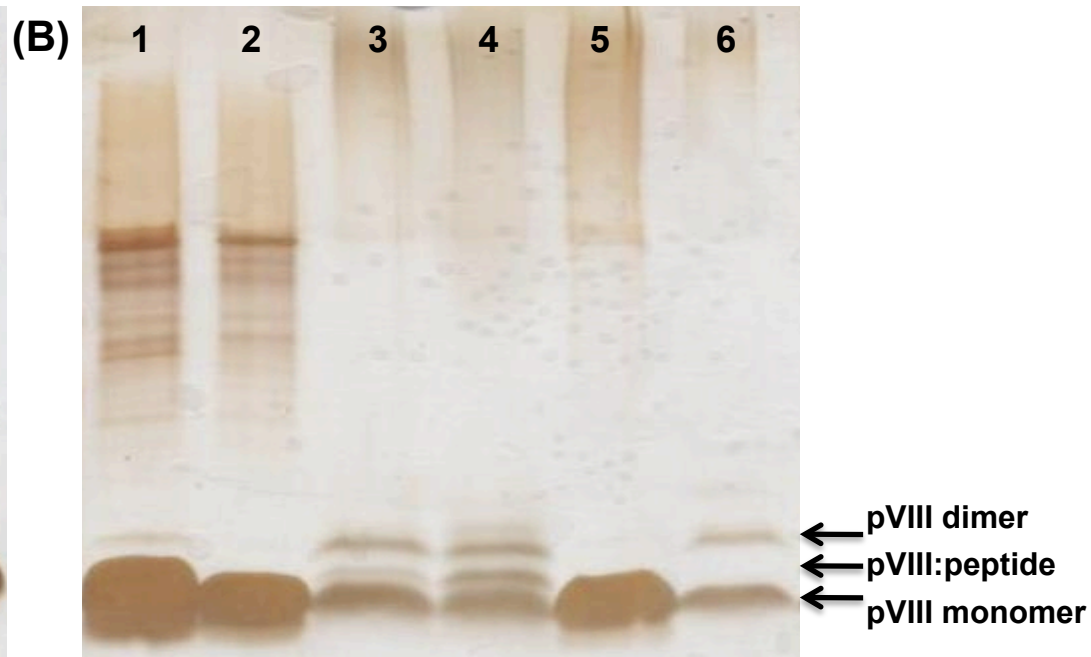

**4E10<sub>L</sub><sup>B</sup> Phage Conjugate**
